# Supplementary material
Source: publisher figshare collection journal article supplement (https://acs.figshare.com/ndownloader/files/3697874)
Supplement: Supplementary file 1 [file 3697874]

## Supporting Information (SI)

### Thiol-ene Linear Step-Growth Photopolymerization in Miniemulsion: Fast Rates, Redox-Responsive Particles, and Semi-Crystalline Films

Florent Jasinski, Agnès Rannée, Julie Schweitzer, Diane Fischer, Emeline Lobry, Abraham Chemtob, Céline Croutxé-Barghorn, Marc Schmutz, Didier Le Nouen, Adrien Criqui

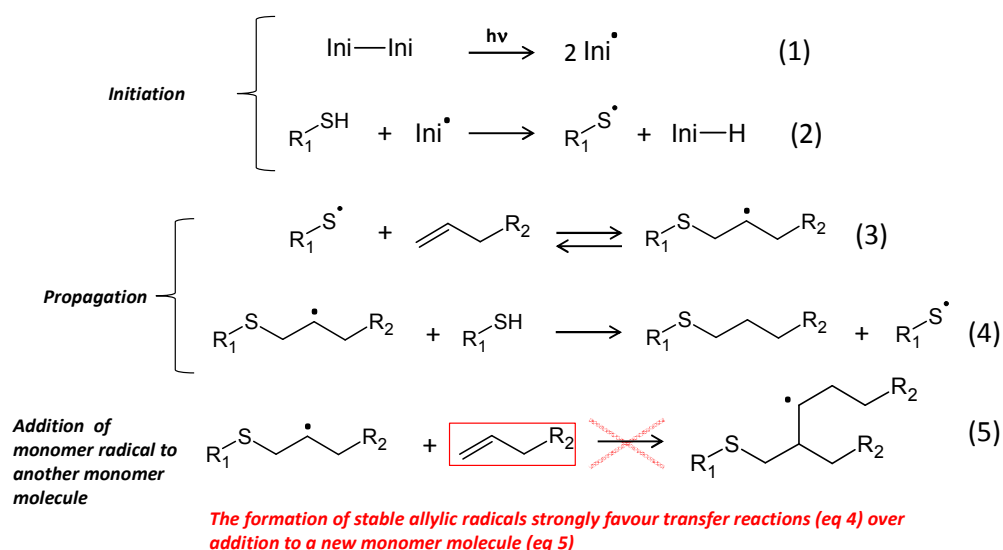

**Scheme S1.** Mechanism of thiol-ene coupling reaction. Thiols can rapidly transfer a hydrogen atom to most types of photogenerated radical arising from a radical photoinitiator (eq 1-2, initiation). The resultant thiyl radical adds to the C=C bond to form a carbon-centered radical via a reversible process (eq 3, propagation step). The resulting radical can then abstract a hydrogen atom from another molecule of thiol to give the thioether product and a thiyl radical, which propagates the chain (eq 4, propagation step). A number of thiyl and carbon radical recombinations lead to termination.

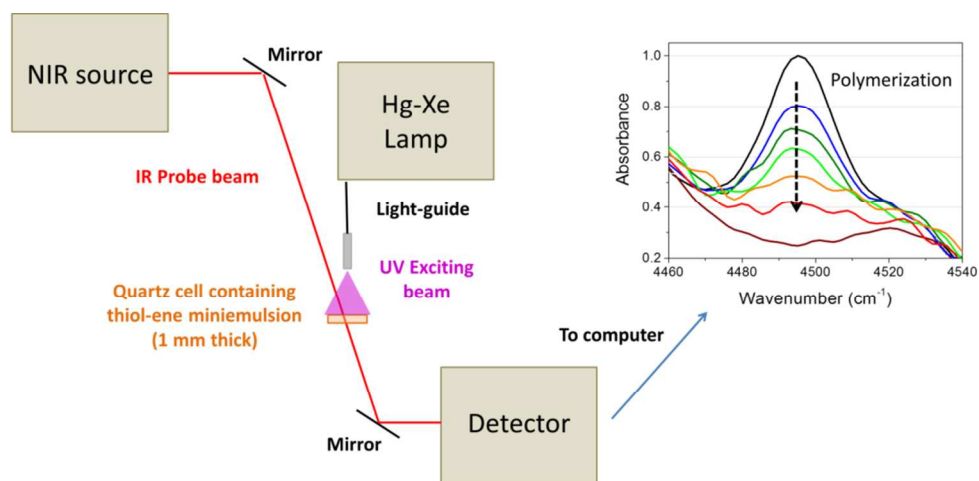

**Scheme S2.** RT-FTNIR spectroscopy irradiation set-up for the online monitoring of reaction kinetics.

**Table S1.** Reproducibility experiments for the miniemulsions **M1**, **M2** and their resulting nanolatexes. Droplet and particle diameters were obtained by DLS.  $D_d$  were determined just after emulsification; and  $D_p$  after 20 s irradiation (nm). The size data are given in nm. The photopolymerizations were performed in a 1 mm thick spectroscopic cell under continuous light (filtered at 310 nm) provided by a mercury-xenon arc lamp ( $\lambda = 310\text{-}600\text{ nm}$ ,  $I = 590\text{ mW/cm}^2$ ).

| Entry                   | Run 1 : $D_d / D_p$ | Run 2 : $D_d / D_p$ | Run 3 : $D_d / D_p$ | Run 4 : $D_d / D_p$ | Run 5 : $D_d / D_p$ |
|-------------------------|---------------------|---------------------|---------------------|---------------------|---------------------|
| <b>M1</b> + 40 ppm DBHQ | 163 / 165           | 158 / 162           | 160 / 158           | 159 / 164           | 145 / 140           |
| <b>M2</b> + 40 ppm DBHQ | 153 / 163           | 192 / 171           | 156 / 158           | 193 / 182           | 156 / 183           |

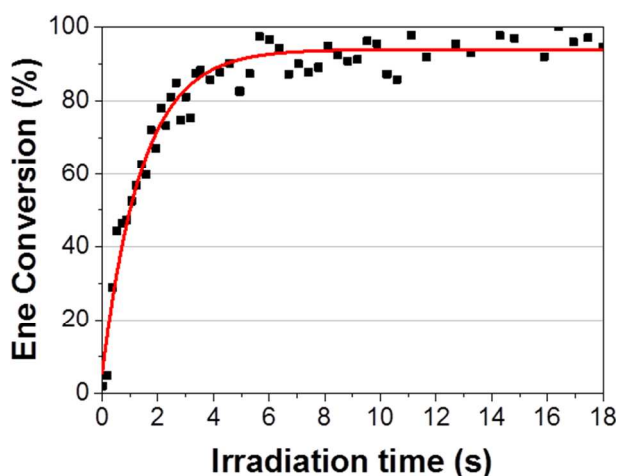

**Figure S1.** Experimental conversion vs time plot for thiol-ene miniemulsion photopolymerization were obtained by RT-FTNIR spectroscopy (■). Respective generated curve after fitting (red line). Sigmoidal functions Analytical solutions were used to fit the experimental data. Photopolymerization was performed in a 1 mm thick spectroscopic cell under continuous light (filtered at 310 nm) provided by a mercury-xenon medium pressure arc lamp.  $D_d = 150\text{ nm}$ ,  $C_{\text{monomer}} = 20\text{ wt \%}$ .

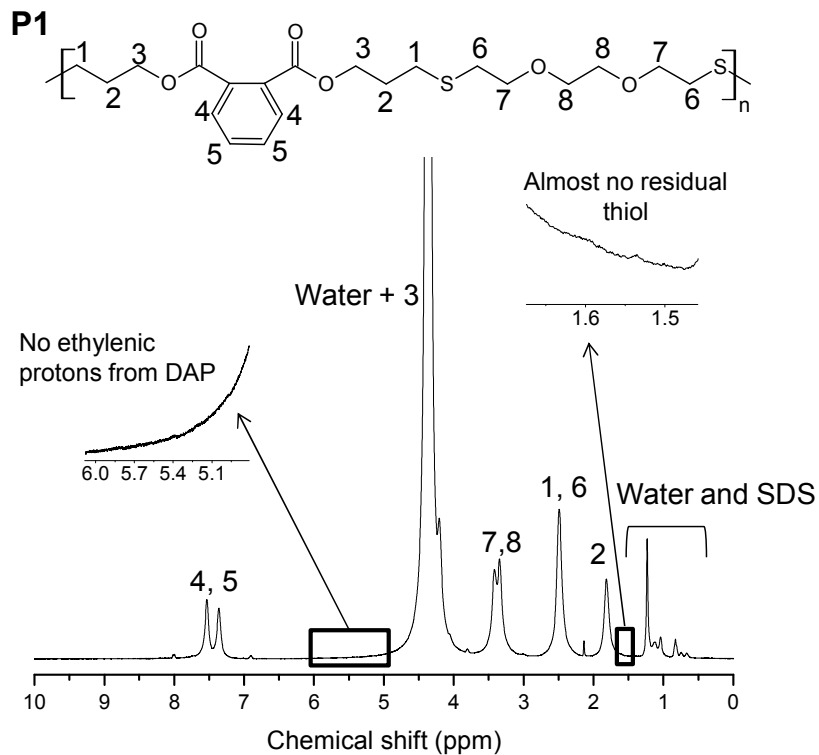

**Figure S2.** Online detection of ene conversion in **P1** by  $^1\text{H}$  NMR spectrum performed at  $60^\circ\text{C}$ . The  $\text{H}_2\text{O}$  broad signal at 4.20 ppm dominates the spectrum as expected. However, the olefinic (5 - 6 ppm) and thiol (1.5 - 1.6 ppm) regions are sufficiently resolved to detect the presence of residual end chains. Ethylenic protons signals from **DAP** (5.25 ppm and 5.90 ppm) or thiol protons resonances from **EDDT** (1.55 ppm) vanished below the noise level.

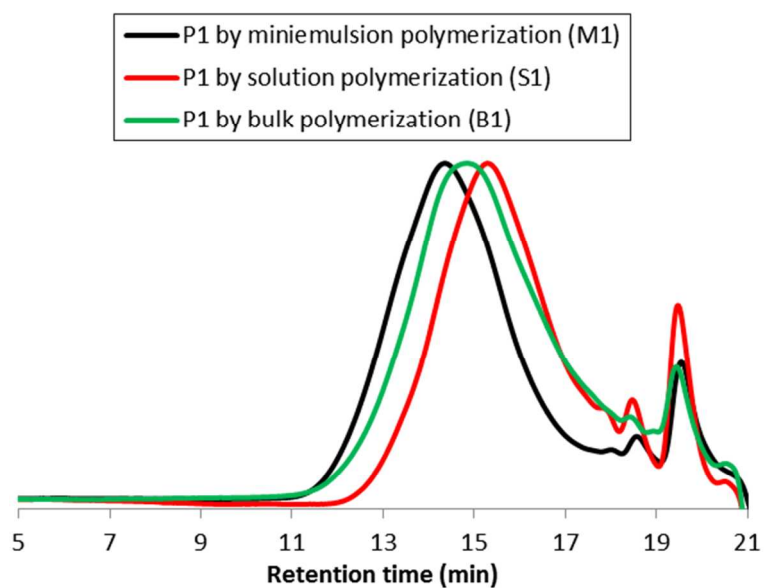

**Figure S3.** SEC traces of **P1** produced by photopolymerization in miniemulsion (**M1**, black line), bulk (**B1**, green line) and solution (**S1**, red line) in DMSO. Photopolymerization was performed in a 1 mm thick spectroscopic cell under continuous light (filtered at 310 nm) provided by a mercury-xenon medium pressure arc lamp at  $C_{\text{monomer}} = 20$  wt %.

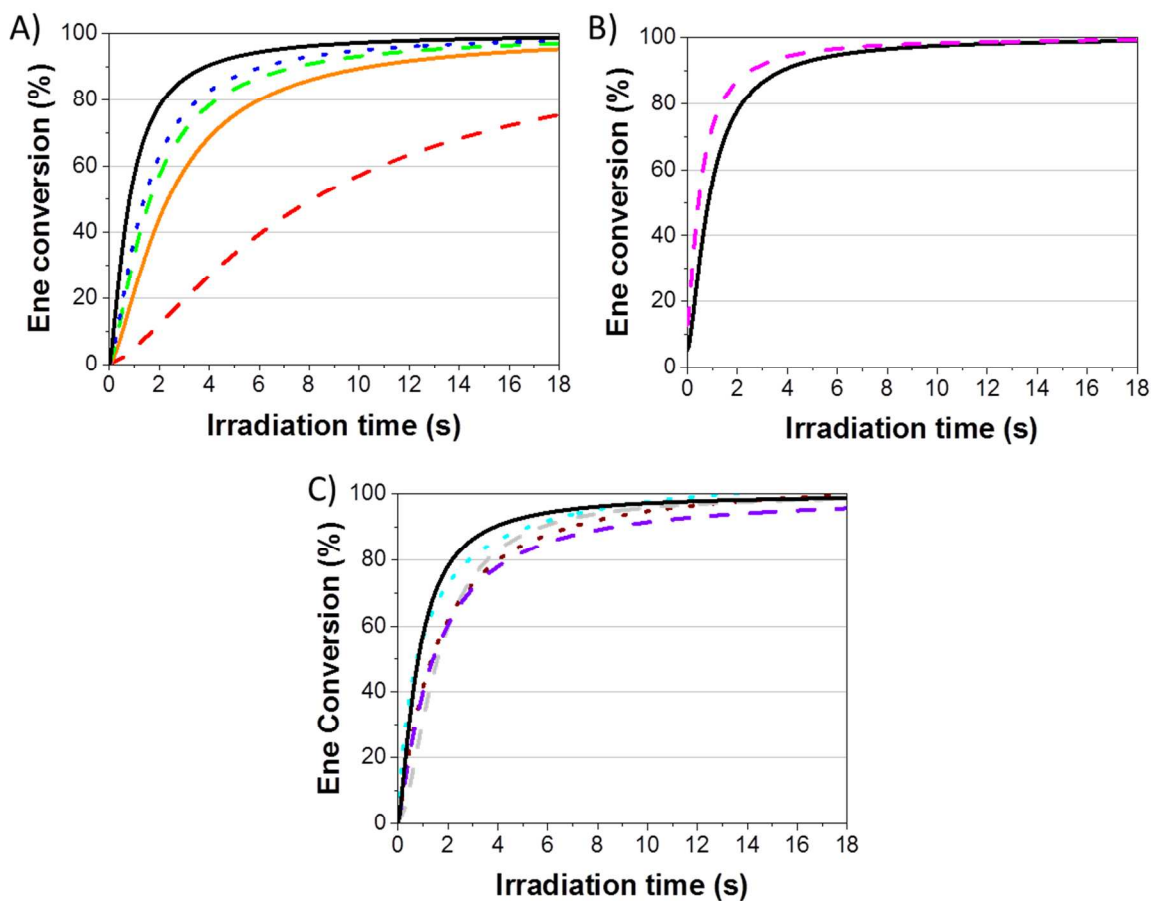

**Figure S4.** Effect of various parameters on conversion vs time curves profiles for EDDT-DAP miniemulsion photopolymerization. All photopolymerizations were performed in a 1 mm thick spectroscopic cell under continuous light (filtered at 310 nm) provided by a mercury-xenon medium pressure arc lamp.  $D_d = 150$  nm,  $C_{\text{monomer}} = 20$  wt %

**A) Irradiance effect:**  $\lambda = 310\text{-}600$  nm,  $I = 590$  mW cm<sup>-2</sup> (black line), 294 mW cm<sup>-2</sup> (blue dotted line), 235 mW cm<sup>-2</sup> (green dashed line), 147 mW cm<sup>-2</sup> (orange line), 60 mW cm<sup>-2</sup> (red dashed line),  $PI = I2959$ .

**B) PI effect:** I651 (purple dashed line), I2959 (black line),  $I = 590$  mW cm<sup>-2</sup>.

**C) Monomer content effect:**  $C_{\text{monomer}} = 20$  wt % (black line), 25 wt % (light grey dashed line), 30 wt % (violet dashed line), 35 wt % (light blue line), 50 wt % (brown dotted line),  $I = 590$  mW cm<sup>-2</sup>,  $PI = I2959$ .

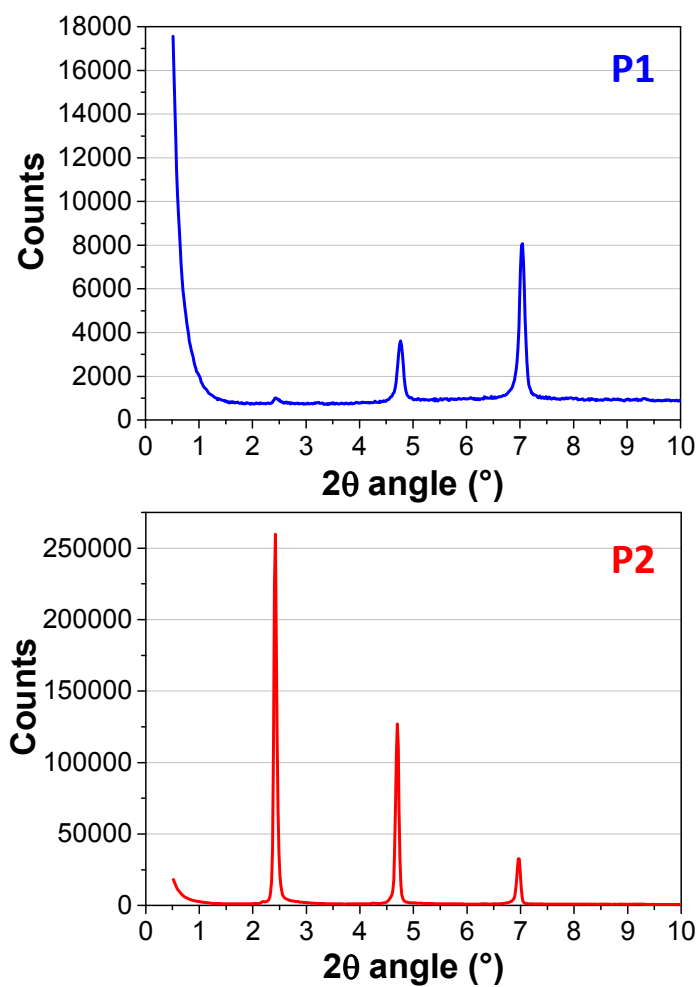

**Figure S5.** Small-angle XRD patterns of **P1** and **P2** films

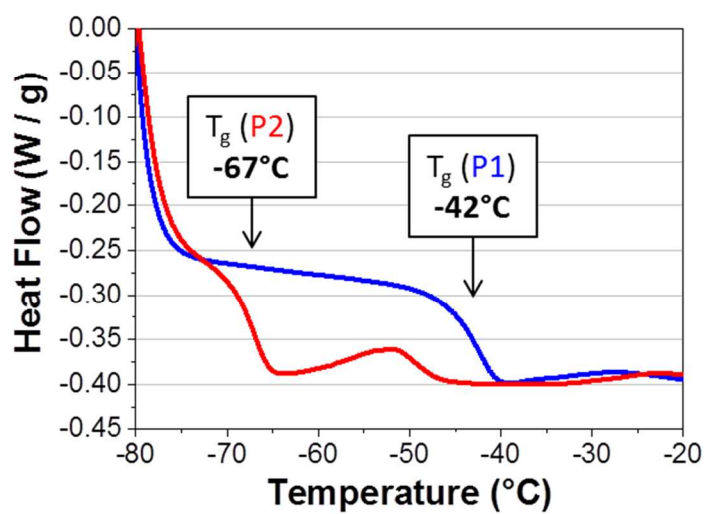

**Figure S6.** DSC thermograms of **P1** and **P2** films in the region between  $-80^\circ\text{C}$  and  $-20^\circ\text{C}$  showing the glass transitions

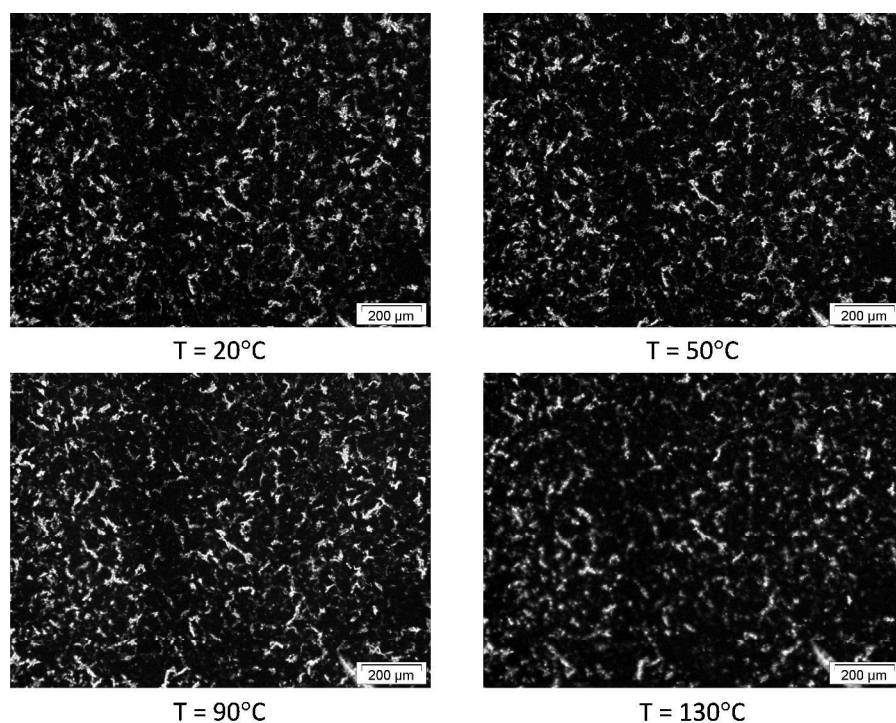

**Figure S7.** Series of POM images of the polysulfide film derived from P2 and taken at different temperatures

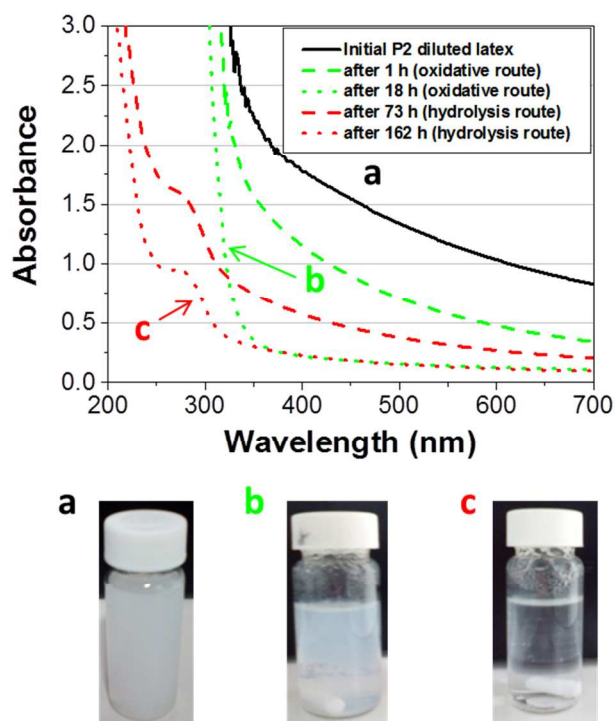

**Figure S8.** UV-Visible absorbance spectra of diluted P2 latex over time, under oxidative and acid hydrolysis stress.
